# Supplementary material for: The Cypriot Indigenous Grapevine Germplasm Is a Multi-Clonal Varietal Mixture
Source: MDPI journal article supplement (doi:10.3390/plants9081034), 2020-08-14

### Morphological characters used for the discrimination of varieties.

|                                       | <b>Xynisteri</b>                                 | <b>Mavro</b>                                              | <b>Maratheftiko</b>                                          |
|---------------------------------------|--------------------------------------------------|-----------------------------------------------------------|--------------------------------------------------------------|
| Woody shoot width                     | intermediate                                     | small                                                     | large                                                        |
| Woody shoot colour                    | yellow or yellowish brown                        | dark brown                                                | reddish brown                                                |
| Bud fruitfulness after the 6th node   | no                                               | no                                                        | yes                                                          |
| Trend for suckers near the trunk base | no                                               | yes                                                       | no                                                           |
| Shoot attitude                        | erect or drooping                                | semi-erect or semi-drooping                               | erect                                                        |
| Nonoccurrence of buds at nodes        | no                                               | no                                                        | some types                                                   |
| Trichomes on leaf surface             | present in some types                            | no                                                        | yes                                                          |
| Shape of blade                        | wedge-shaped, pentagonal                         | pentagonal or reniform                                    | pentagonal or circular                                       |
| Shape of teeth                        | rectilinear or one side concave, one side convex | both sides concave or both sides convex or mixture        | one side convex or mixture                                   |
| General shape of petiole sinus        | Closed or Lobes half overlapping                 | Very wide open or Wide open or Lobes slightly overlapping | Closed                                                       |
| Inflorescence                         | male and female fully developed                  | male and female fully developed                           | female with straight stamens or female with reflexed stamens |
| Berry shape                           | Elliptic or Oblate or Ovate                      | Obtuse-ovate or Obovate                                   | Round or Oblate                                              |
| Berry colour                          | green-yellow                                     | blue black                                                | blue black                                                   |

### Leaf diversity across accessions

#### Xynisteri

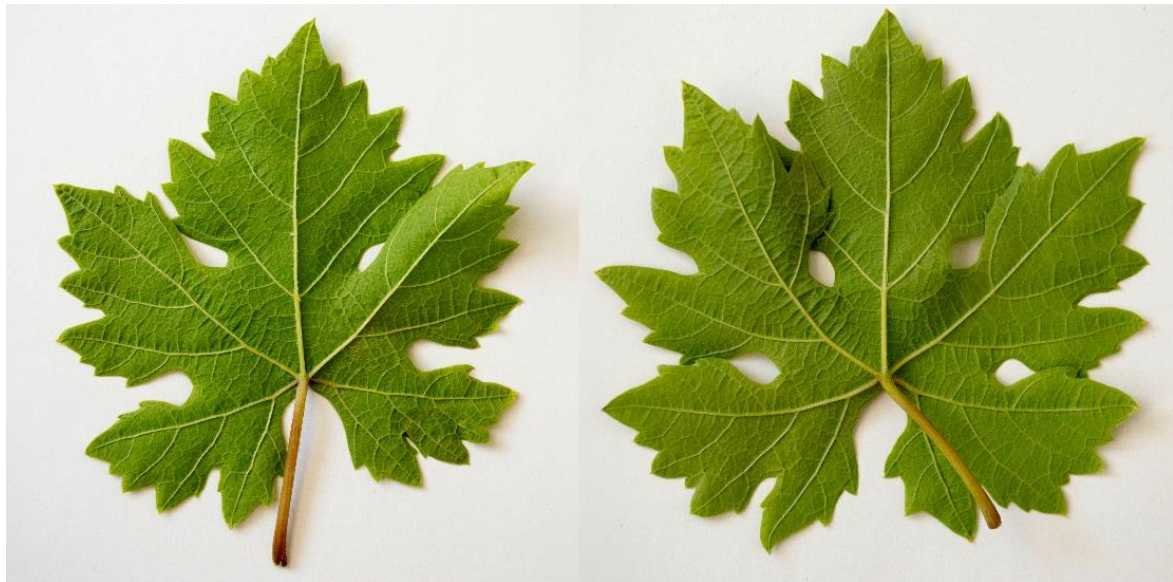

**Mavro**

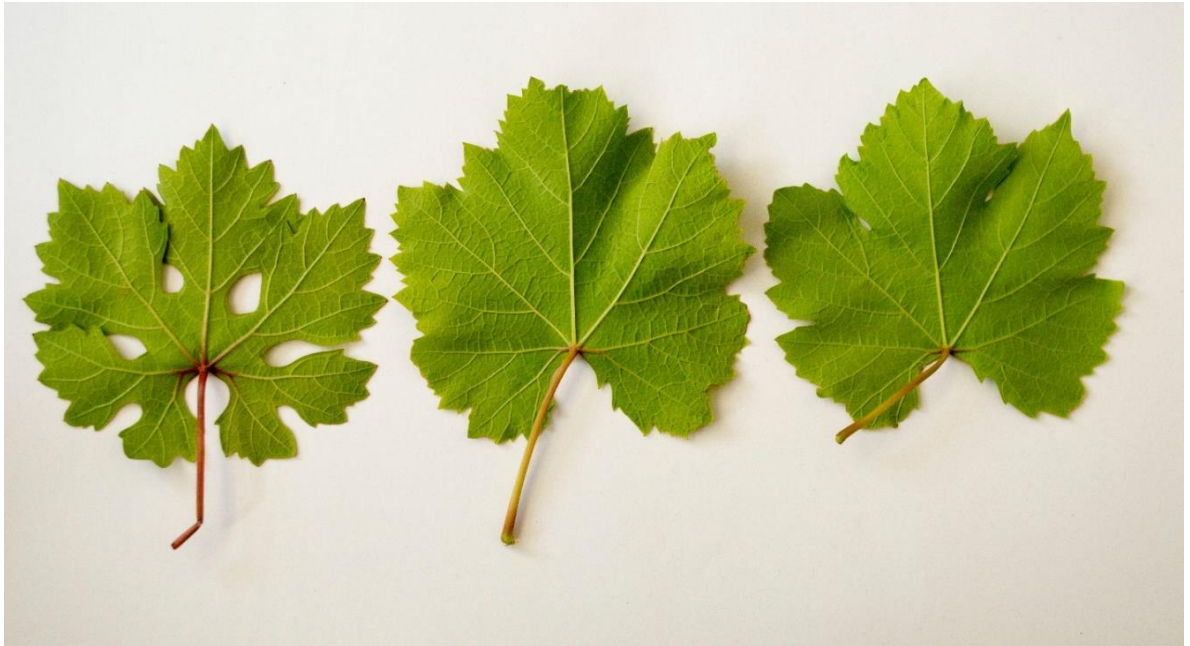

**Maratheftiko**

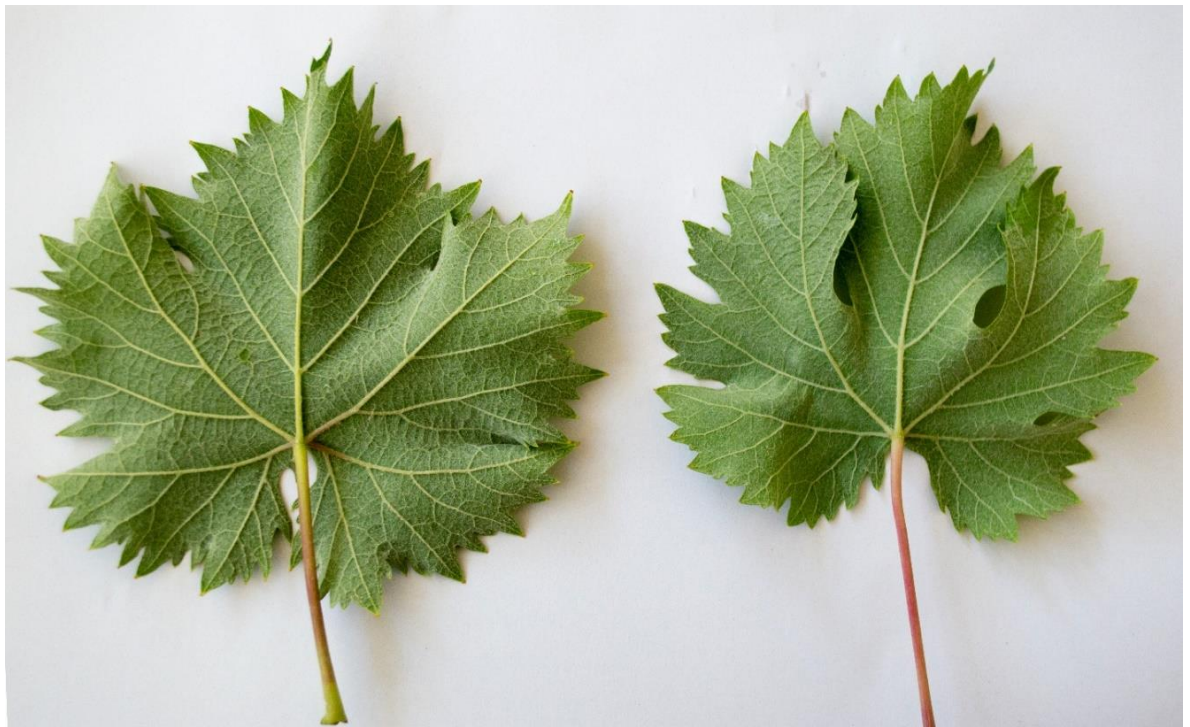

Supplement: s1 [file s1]
